# Supplementary material
Source: publisher site journal article supplement (https://www.dovepress.com/article/384184)
Supplement: Supplementary file 1 [file get_supplementary_file.php]

**SUPPLEMENTARY FIGURES**

Figure S1 AF4-DLS analysis of investigated liposomes: A. liposome F10103; B. Liposome F10102; C. Liposome F20104A Continuous blue line: liposomes in PBS; continuous red line: liposomes in diluted in PBS; black dotted line: z-average [d, nm] of liposomes in PBS; green dotted line: z-average [d, nm] of liposomes in diluted PBS


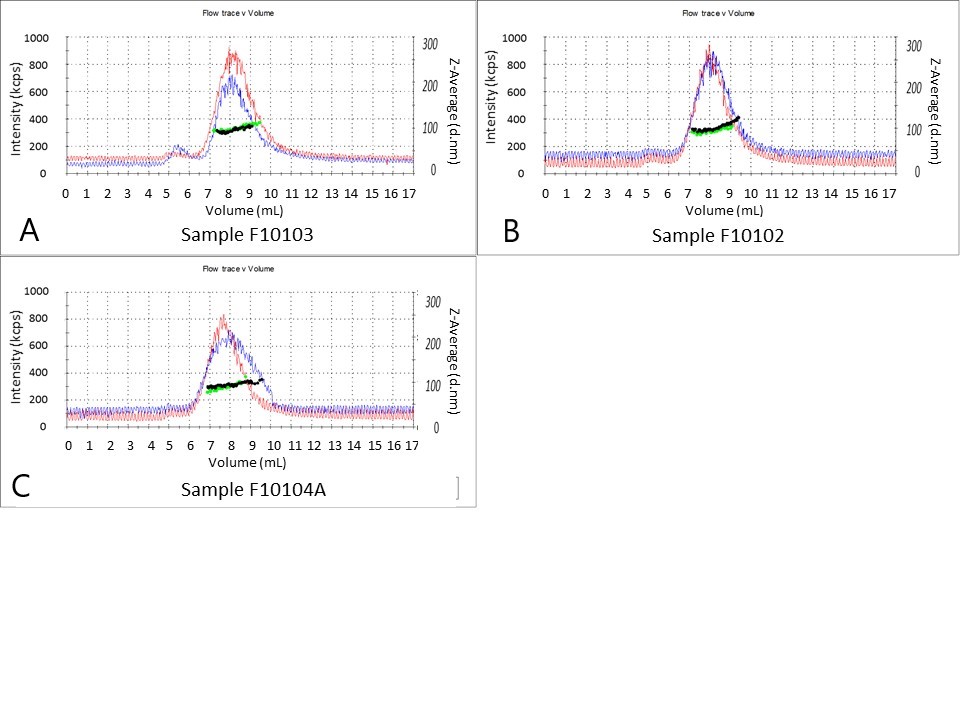


**Figure S2** iC3b variability in serum from healthy donors as response to CV based on: (a) Gender, (b) Rhesus factor (RH+ and RH-) and (c) RH-gender

**
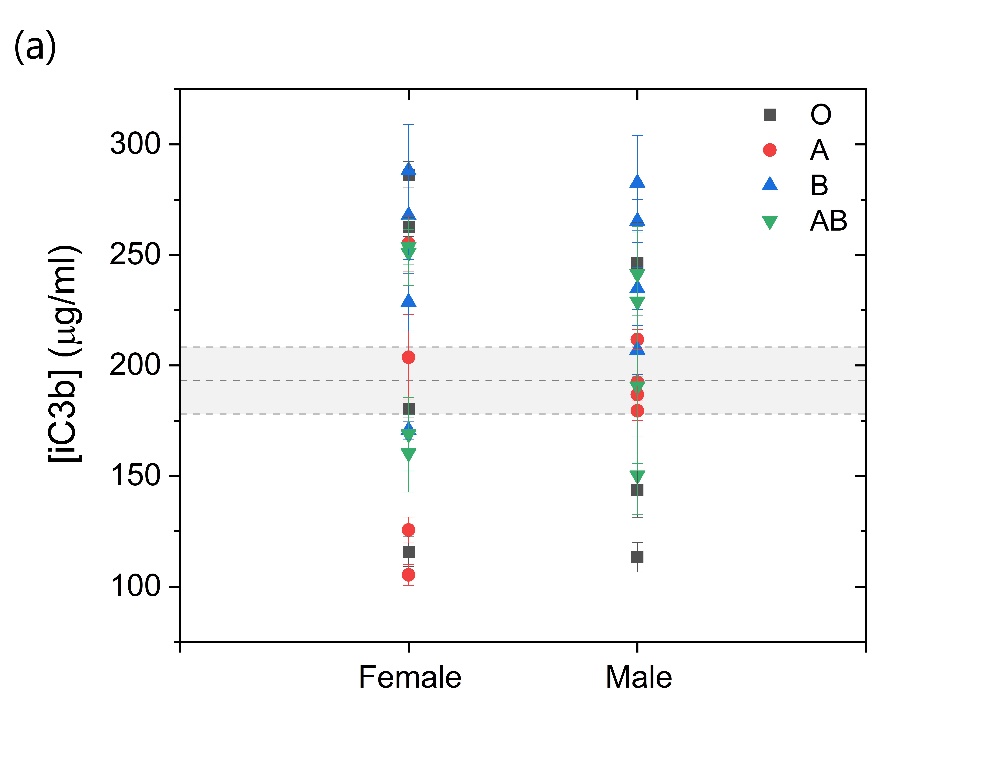
**

**
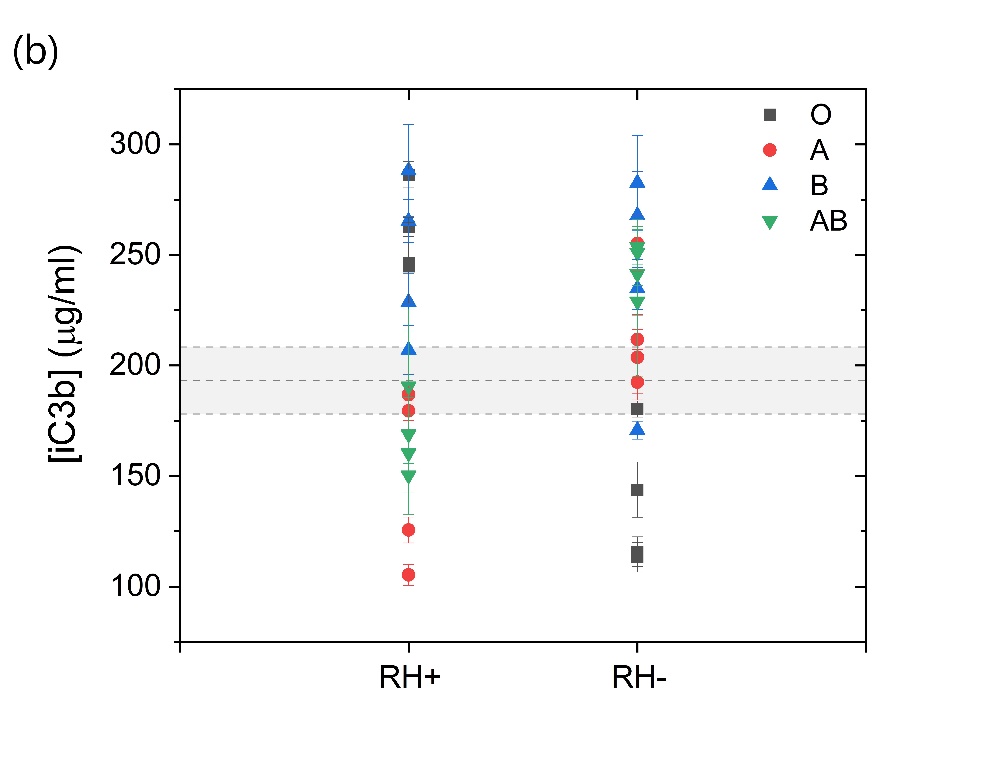
**

**
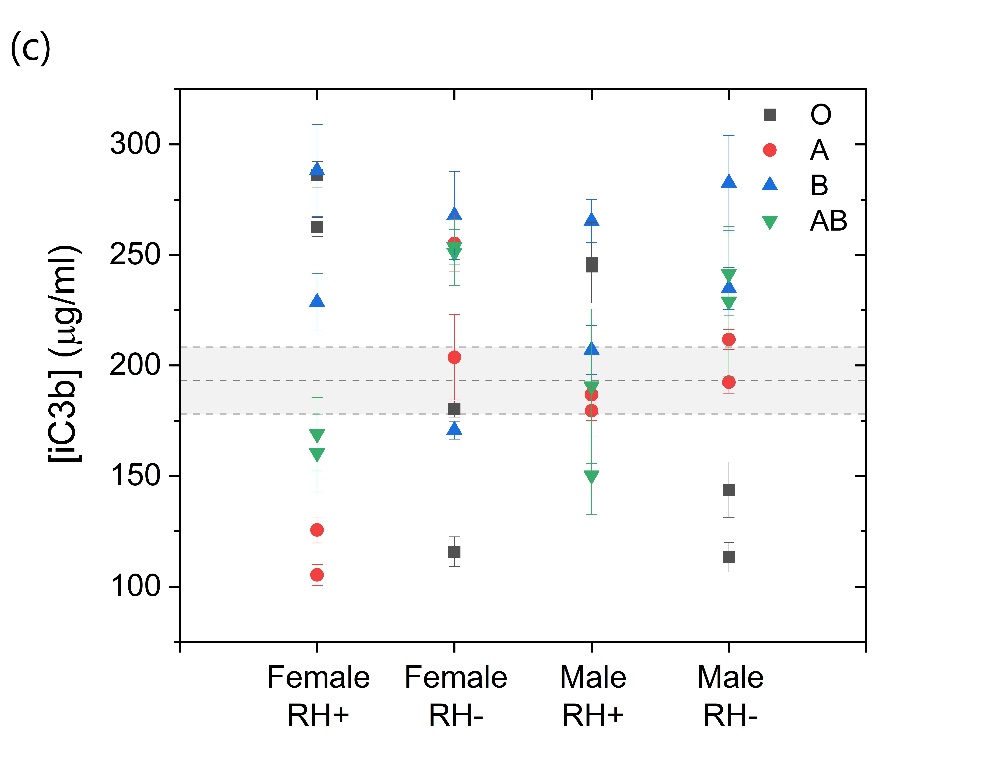
**

**Figure S3** iC3b variability in serum from healthy donors as response to liposome (F20104) based on: (a) Gender, (b) Rhesus factor (RH) and (c) RH-gender


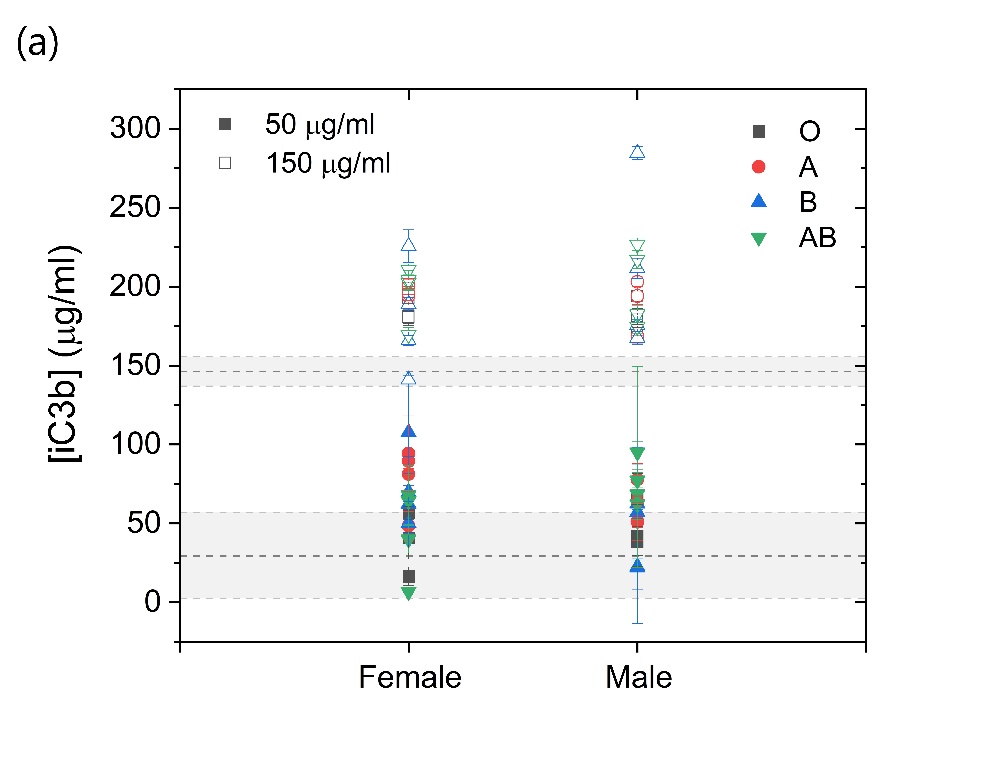


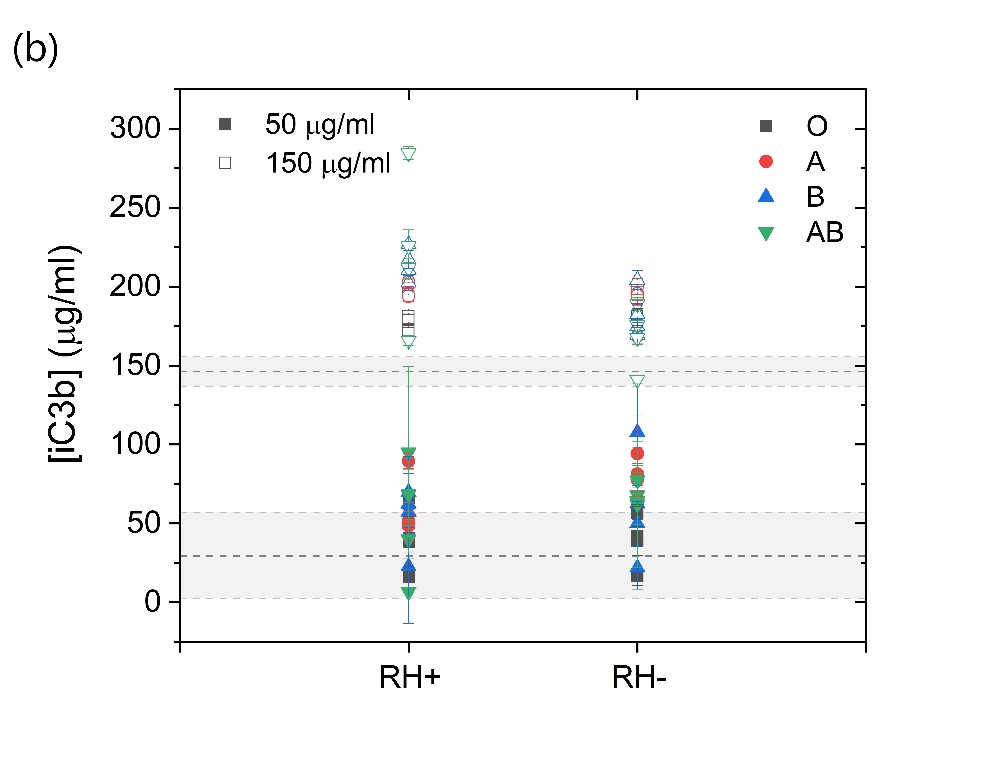


**
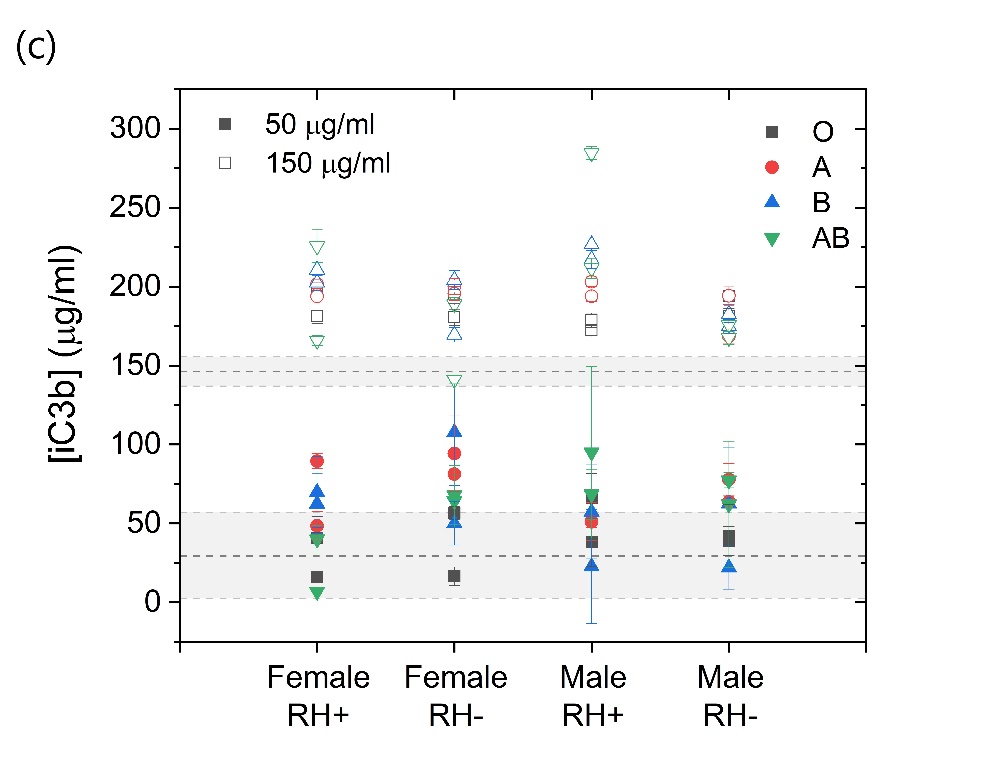
**

**Table S1** Liposomes investigated in the study

| **Catalogue nr.** | **Mean particle size** | **Lipid Stock**  **concentration [mg/ml]** | **Lipid composition** | **Hydration buffer (loading battery)** |
| --- | --- | --- | --- | --- |
| F20104A | 100 nm  (95-120 nm) | 36.3 | HSPC/CHOL (55:45 mol/mol) | 250 mM ammonium sulfate External solution: 10% sucrose, 20mM NaPO4, pH 6.5 +/- 0.2 |
| F20103A | 36.5 | DSPC/CHOL (55:45 mol/mol) | 250 mM ammonium sulfate External solution: 10% sucrose, 20mM NaPO4, pH 6.5 +/- 0.2 |
| F10102 | 34.6 | DPPC/CHOL (55:45 mol/mol) | Internal/External solution: 10% sucrose, 20 mM HEPES, pH 7.0 - 7.5 |

**Table S2** Information on clinical parameters of human serum obtained from both healthy donors (S2A) and patients (S2B) with pre-existing conditions

(S2A)

| **Health status** | **Donors** | **Blood type** | **Rhesus (Rh)** | **Gender** | **Age** | **Ig G** | **Ig M** |
| --- | --- | --- | --- | --- | --- | --- | --- |
| Healthy | 1 | A | + | female | 59 | 806 | 107 |
| 2 | 41 | 1125 | 95 |
| 3 | male | 59 | 945 | 49 |
| 4 | 48 | 1087 | 82 |
| 5 | - | female | 31 | 1126 | 88 |
| 6 | 50 | 1423 | 97 |
| 7 | male | 52 | 730 | 77 |
| 8 | 23 | 775 | 94 |
| 9 | O | + | female | 55 | 885 | 299 |
| 10 | 58 | 594 | 74 |
| 11 | male | 56 | 750 | 91 |
| 12 | 54 | 616 | 60 |
| 13 | - | female | 55 | 1113 | 137 |
| 14 | 54 | 937 | 28 |
| 15 | male | 50 | 1081 | 58 |
| 16 | 57 | 833 | 72 |
| 17 | B | + | female | 51 | n.a. | n.a. |
| 18 | 56 | n.a. | n.a. |
| 19 | male | 54 | 1127 | 38 |
| 20 | 52 | 645 | 25 |
| 21 | - | female | 57 | 808 | 60 |
| 22 | 27 | 1153 | 68 |
| 23 | male | 24 | 1085 | 74 |
| 24 | 47 | n.a. | n.a. |
| 25 | AB | + | female | 50 | 758 | 88 |
| 26 | 59 | 694 | 38 |
| 27 | male | 54 | 985 | 84 |
| 28 | 58 | 844 | 128 |
| 29 | - | female | 32 | 721 | 90 |
| 30 | 60 | 1201 | 51 |
| 31 | male | 28 | 902 | 85 |
| 32 | 24 | 809 | 58 |

(S2B)

| **Patients with pre-existing conditions** | **Donors** | **Blood type** | **Rhesus (Rh)** | **Gender** | **Age** | **Ig G** | **Ig M** | **Allergy type** |
| --- | --- | --- | --- | --- | --- | --- | --- | --- |
| Allergy | 1 | A | + | female | 52 | 771 | 91 | t4, f17, f94, f49 (G3), t3, poplar (G4) |
| 2 | 56 | 1061 | 63 | t2 (G4), t4 (G3), t3 (G5), w6 (G2), f13 (G2), f17, f94, chroma, nickel, cobalt |
| 3 | male | 59 | 950 | 46 | pollen unspecified (G3) |
| 4 | 50 | 932 | 89 | pollen (grass), pollen (trees) |
| 5 | - | female | 44 | 1278 | 93 | f44 (G1), nickel |
| 6 | 53 | 1164 | 101 | t4, t3, w6, m01, sticking plaster, chicken/pigeon (feahthers) (G4), d01, d0, f02, f04, sun (G3) |
| 7 | male | 31 | 1282 | 120 | pollen, cereals |
| 8 | 39 | 1001 | 99 | pollen (grass), pollen (early and middle flowering plants and trees), i3 (G3) |
| 9 | O | + | female | 45 | 957 | 155 | t2, t4, t3 (G3), e1 (G1), stone fruit, apple, cherry |
| 10 | 71 | 1258 | 64 | t2, sticking plaster (G3), t4, t3, f84 (G2) |
| 11 | male | 36 | 947 | 65 | t2, t4, d01, d02, f49 (G3), t3 (G4), f85(G1) |
| 12 | 34 | n.a. | n.a. | e1 (G3) |
| 13 | - | female | 70 | 799 | 59 | mites, mold, fragrances, nickel |
| 14 | 24 | 1297 | 64 | pollen (G3-G4) |
| 15 | male | 72 | 1221 | 55 | t2, t4, t3 (G5) |
| 16 | 56 | 1022 | 68 | g6 (G4), g8 (G4), t3 (G3) |
| 17 | B | + | female | 31 | 791 | 80 | w6 (G5), d01, d02, d70, d72, f44 |
| 18 | 64 | 1065 | 98 | i1 (g2), i3 (G4), penicillin |
| 19 | male | 55 | 1186 | 37 | f84 (G4) |
| 20 | 56 | 1074 | 96 | pollen grass (G3), t4, e5, f17 (G4), t3 (G3), e1, e3 (G5) |
| 21 | - | female | 51 | 816 | 100 | t4, t3 (G1), f02 (G3) |
| 22 | 57 | 845 | 64 | k82 (G2), nickel, cobalt (G5), fragrances, Perubalsam (G2), benzocaine (G1) |
| 23 | male | n.a. | n.a. | n.a. | n.a. |
| 24 | n.a. | n.a. | n.a. | n.a. |
| 25 | AB | + | female | 59 | 807 | 70 | m01, m03 (G5), f85 (G2), garlic (G4), w6 |
| 26 | 41 | 872 | 86 | g12 (G4), t2, t4, t3 (G5), w1, w6 (G1), d01, d02 (G5), m03, m06, Cladosporium herbarium (G2), f17, melon, apple, cherry (G4) |
| 27 | male | n.a. | n.a. | n.a. | n.a. |
| 28 | n.a. | n.a. | n.a. | n.a. |
| 29 | - | female | 61 | 1158 | 46 | t4 (G3), e1, d01 (G4) |
| 30 | 47 | 1082 | 148 | chrome, nickel (G4), pollen, palladium |
| 31 | male | n.a. | n.a. | n.a. | n.a. |
| 32 | n.a. | n.a. | n.a. | n.a. |

| **Patients with pre-existing conditions** | **Donors** | **Gender** | **Age** | **Ig G** | **Ig M** | **Cancer type** |
| --- | --- | --- | --- | --- | --- | --- |
| Cancer | 1 | female | 66 | 888 | 20 | Breast cancer |
| 2 | female | 67 | 712 | 73 |
| 3 | female | 66 | 1414 | 117 |
| 4 | female | 69 | 789 | 93 |
| 5 | female | 66 | 1562 | 81 |
| 6 | female | 68 | 1072 | 130 |
| 7 | female | 68 | 876 | 41 |
| 8 | female | 73 | 1147 | 116 |
| 9 | male | 67 | 920 | 97 | Lung cancer |
| 10 | female | 75 | 972 | 49 |
| 11 | female | 75 | 590 | 163 |
| 12 | male | 76 | 394 | 96 |
| 13 | female | 75 | 542 | 151 |
| 14 | male | 65 | 509 | 69 | Not declared |
| 15 | female | 72 | 681 | 53 | Not declared |

| **Patients with pre-existing conditions** | **Donors** | **Blood type** | **Rhesus (RH)** | **Gender** | **Age** | **Ig G** | **Ig M** | **Diagnosis** |
| --- | --- | --- | --- | --- | --- | --- | --- | --- |
| Immunodeficiency | 1 | A | + | female | 78 | 1289 | 113 | M05.84, M81.99, I45.9 |
| 2 | 74 | 716 | 50 | M06.09, I10.90, E06.3G, E78.0 |
| 3 | A | - | female | 70 | 1669 | 128 | M06.09, E11.90, I10.90 |
| 4 | 71 | 703 | 87 | M05.84G, M81.99G |
| 5 | O | + | female | 61 | 1387 | 120 | M05.80G, I25.9G, M17.9G |
| 6 | 68 | 693 | 91 | M05.90G , I10.90G, E21.0G |
| 7 | male | 57 | 1133 | 53 | M05.80, M81.99, I10.90 |
| 8 | O | - | female | 45 | n.a. | n.a. | rheumatoid arthritis |
| 9 |  |  | male | 40 | 1531 | 91 | M05.80, M35.0 |
| 10 | B | + | female | 75 | 1019 | 55 | M05.80G, M80.40G, K29.7G |
| 11 | female | 66 | 732 | 99 | M06.09G, I10.90G, F31.9G |
| 12 | male | 37 | n.a. | n.a. | rheumatoid arthritis |
| 13 | B | - | female | 64 | 1014 | 70 | M06.09G |
| 14 |  | female | 63 | n.a. | n.a. | M05.84G , M85.89G, M35.3G |
| 15 | AB | + | female | 86 | 869 | 37 | M80.99G |
| 16 |  |  | female | 71 | 1385 | 77 | M05.80, I10.90, E78.0 |

Table S3 Settings of the Asymetrical Flow Field-Flow Fractionation used to characterise Liposomes

| **Step** | **Time  [min]** | **Detector Flow [mL min-1]** | **Cross-Flow [mL min-1]** | **Focus Flow [mL min-1]** |
| --- | --- | --- | --- | --- |
| Elution | 0-2 | 0.3 | 0.3 | 0 |
| Focus | 2-3 |  |  | 1 |
| Focus + Inject | 3-5 |  |  | 1 |
| Focus | 5-7 |  |  | 1 |
| Elution | 7-37 | 0.3 | 0.3 | 0 |
| Elution | 37-48 | 0 | 0 | 0 |
| Elution | 48-50 | 0.3 | 0.3 | 0 |
